# Supplementary material
Source: MDPI journal article supplement (https://www.mdpi.com/2306-5710/4/2/39)

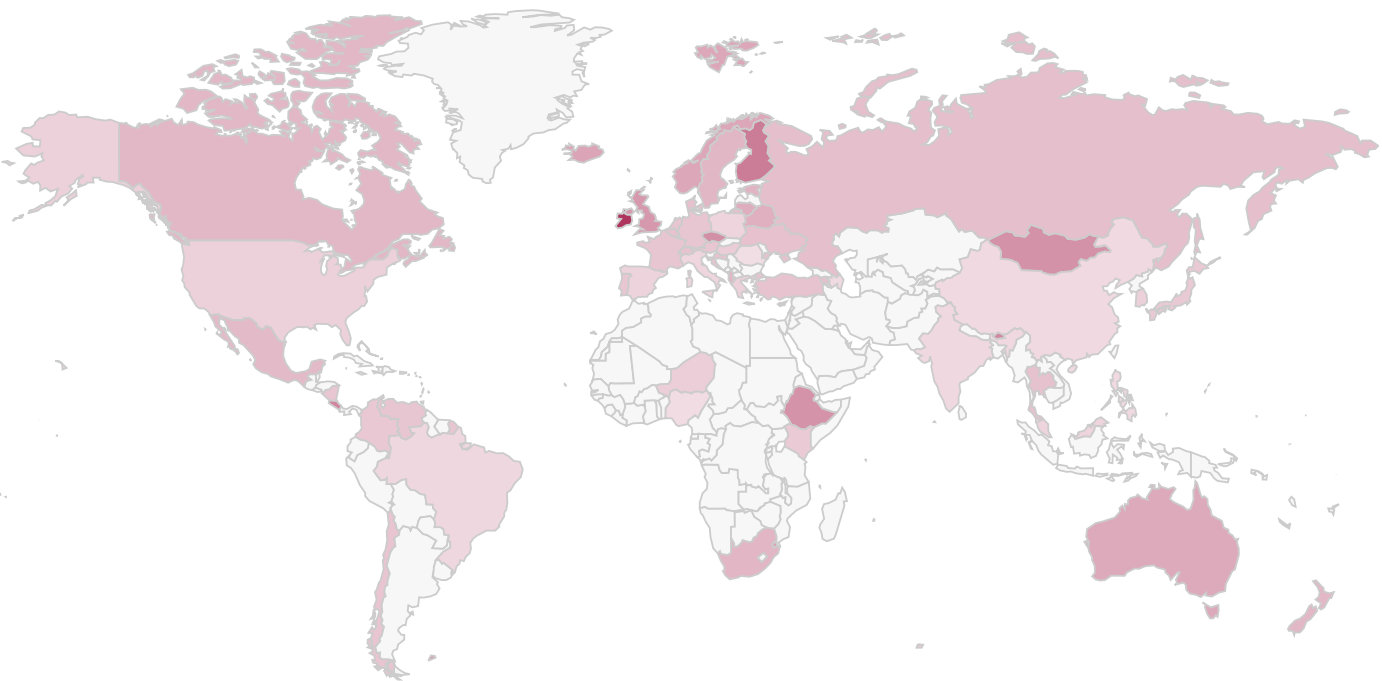

**Figure S1. Alcohol expenditure as percentage of total household expenditure (%)**

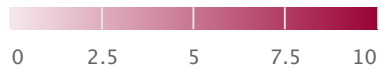

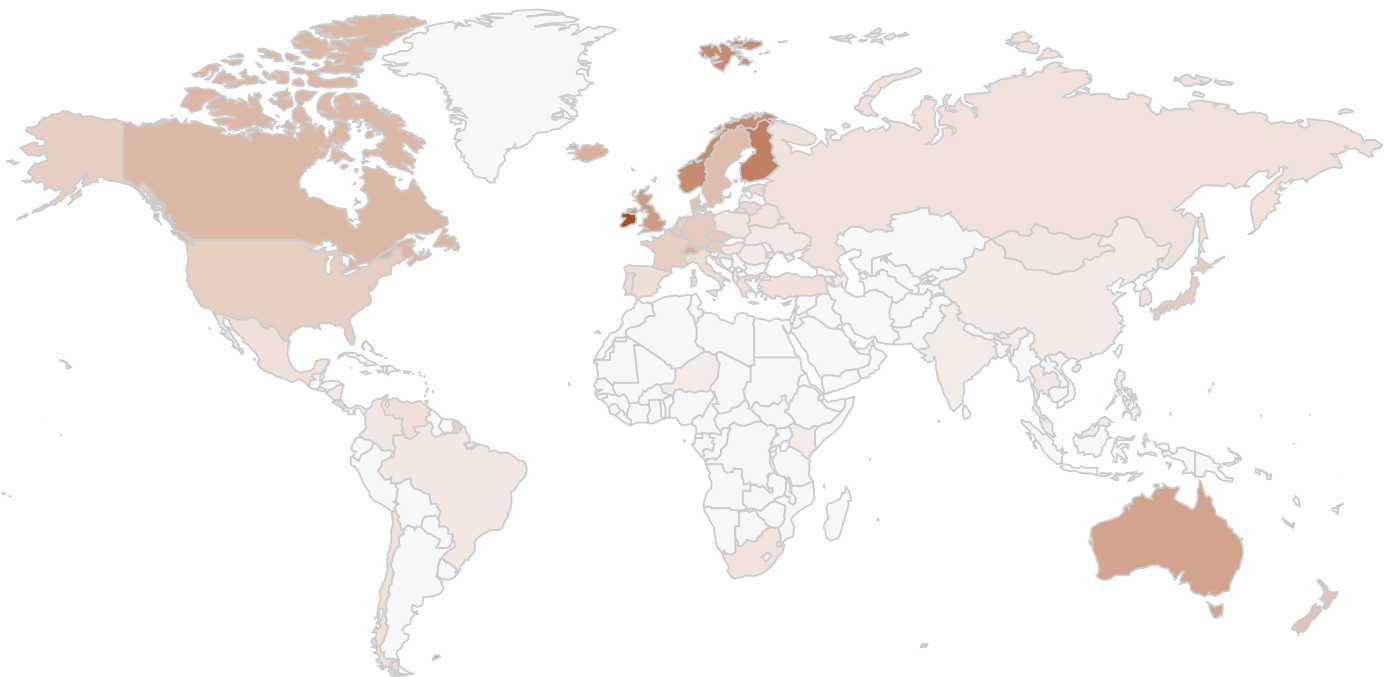

Figure S2. Household expenditure in alcoholic drinks per capita (\$US dollars).

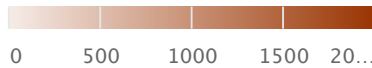

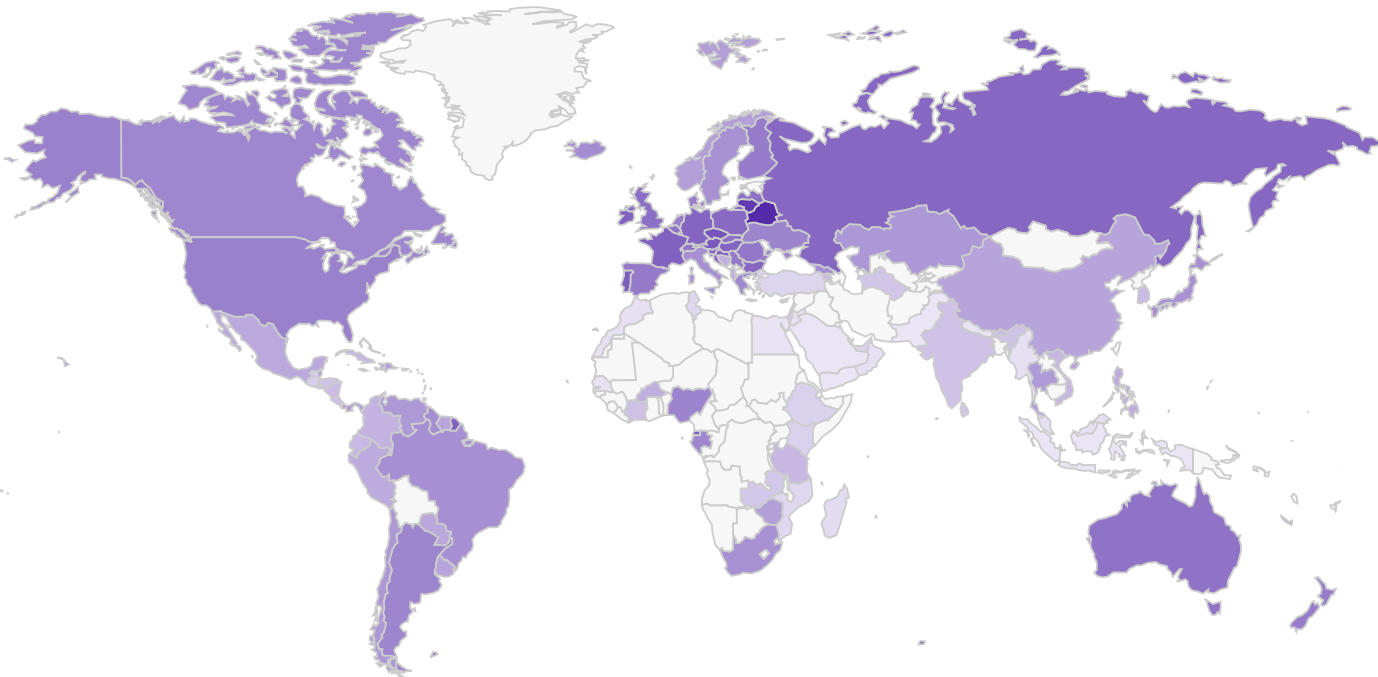

Figure S3. Per capita consumption of alcohol (in L of pure alcohol).

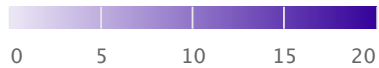

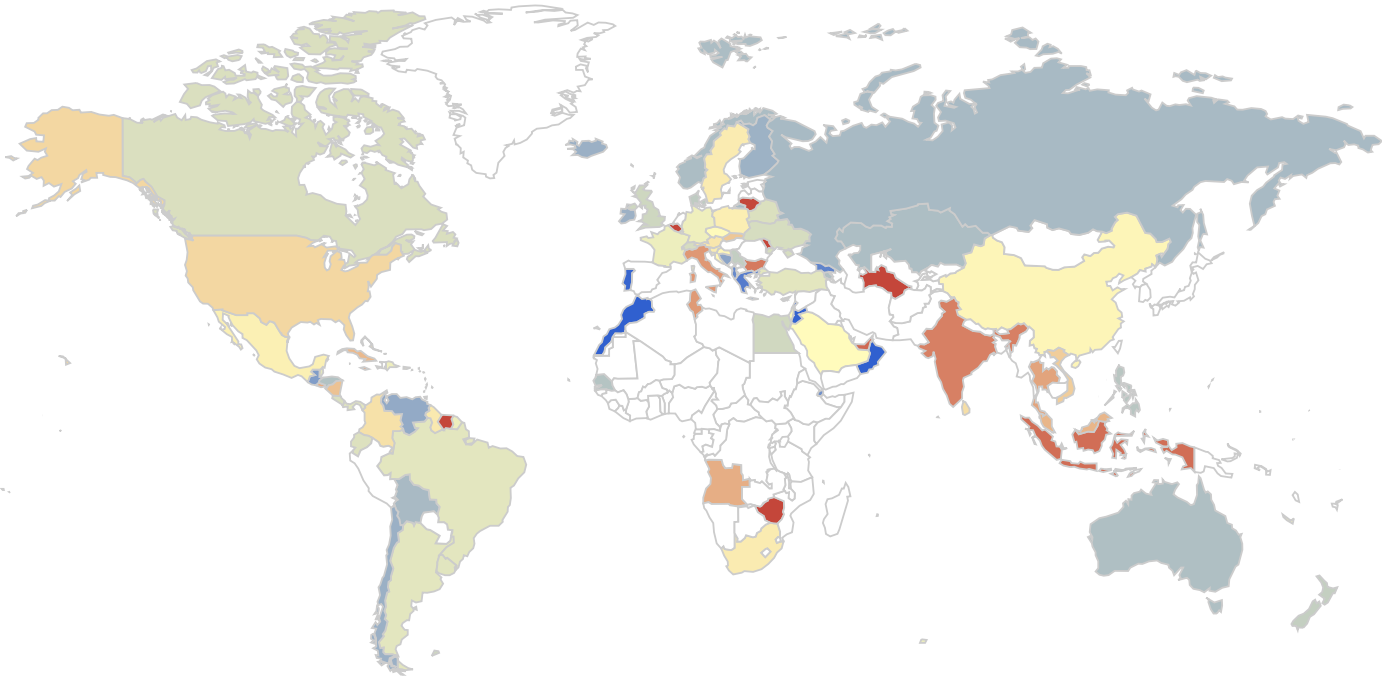

Figure S4. 5 year growth of alcohol consumption per capita (% , 2010-2015).

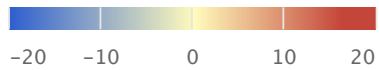

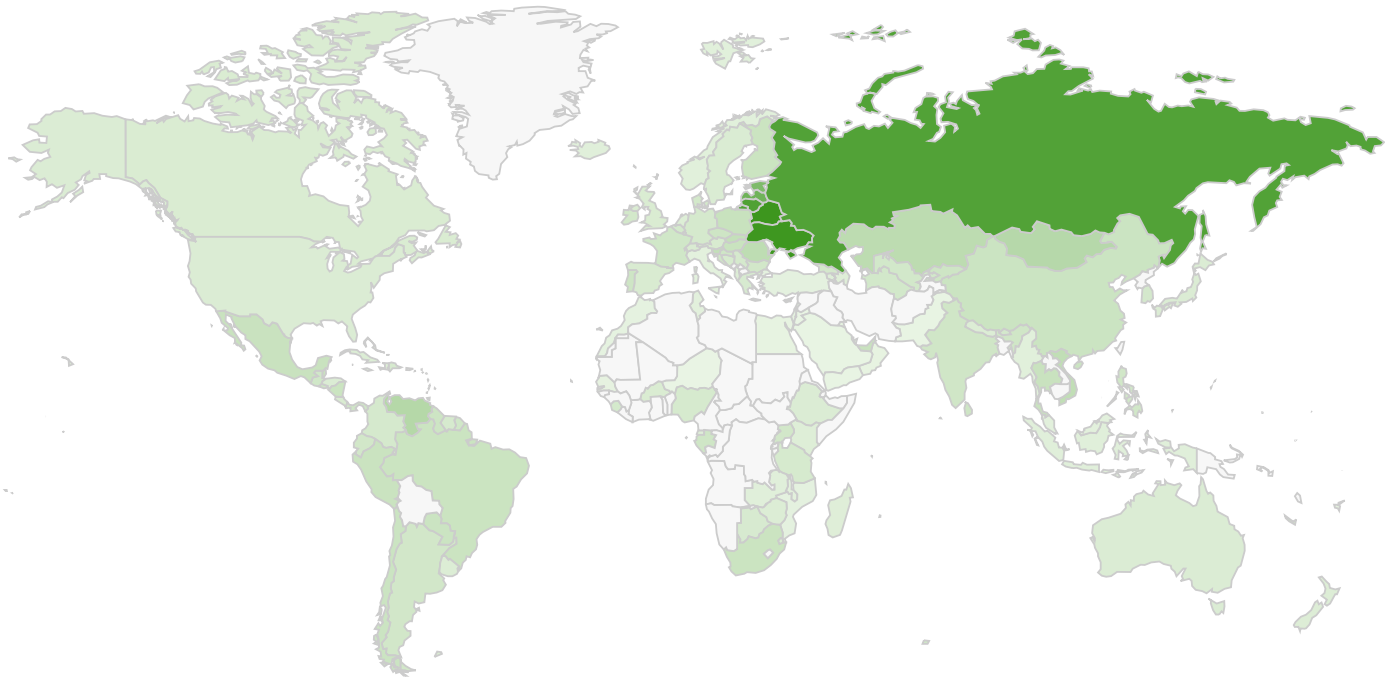

**Figure S5. Alcohol attributable deaths as percentage of total deaths (%).**

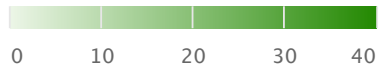

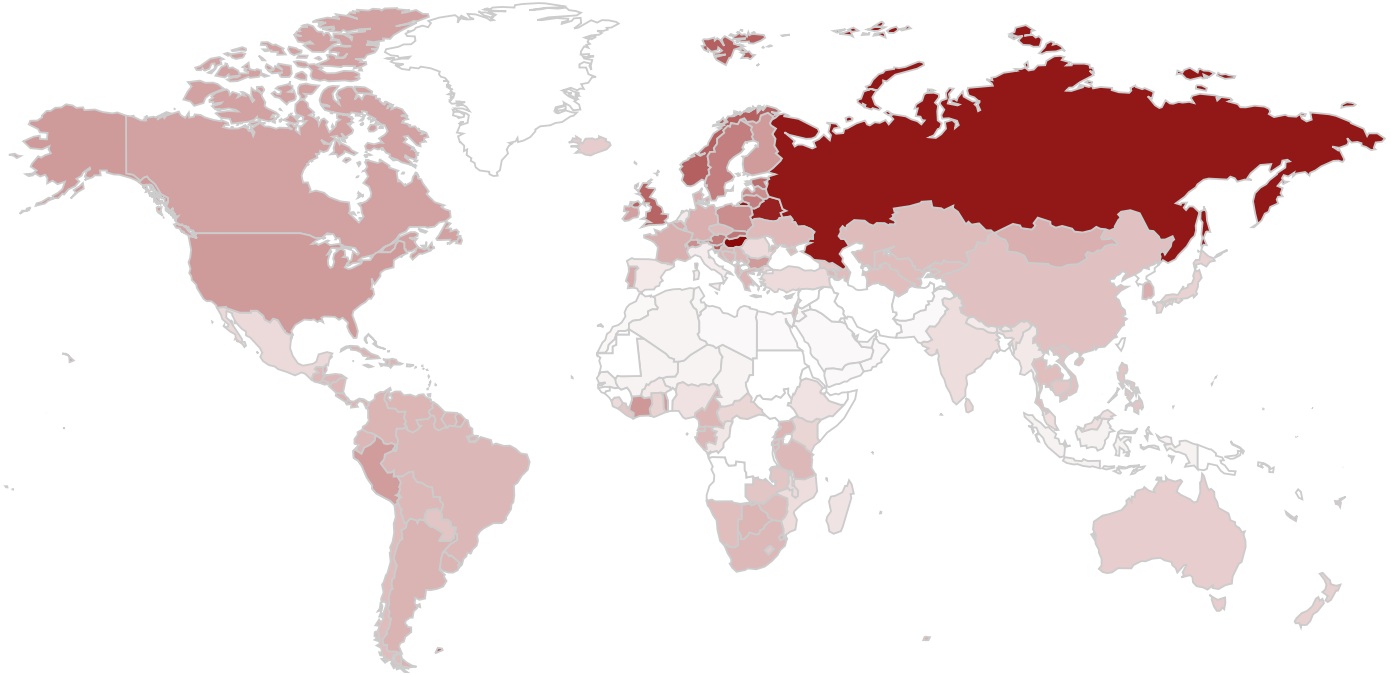

**Figure S6. Alcohol use disorders prevalence percentage per year in adult population (%).**

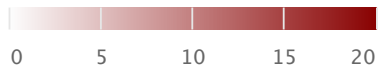

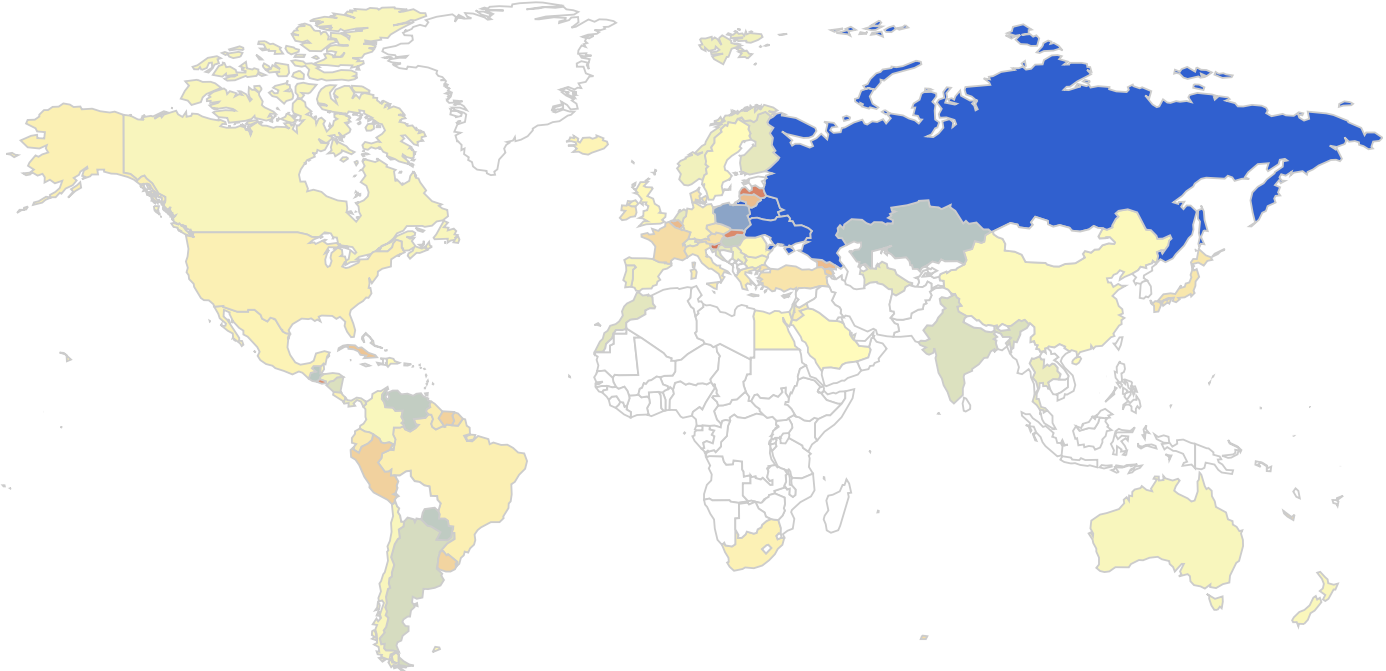

Figure S7. Suceptibility map expected alcohol related deaths change per year

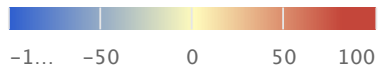

Supplement: s1 [file s1]
